# Supplementary material for: Characterization of neutralizing antibody with prophylactic and therapeutic efficacy against SARS-CoV-2 in rhesus monkeys
Source: Nat Commun. 2020 Nov 13;11:5752. doi: 10.1038/s41467-020-19568-1 (PMC7666115; doi:10.1038/s41467-020-19568-1)
Supplement: Supplementary file 1 — Supplementary Information [file 41467_2020_19568_MOESM1_ESM.pdf]

## **Supplementary Information**

**Characterization of neutralizing antibody with prophylactic and  
therapeutic efficacy against SARS-CoV-2 in rhesus monkeys**

**Wang et al.**

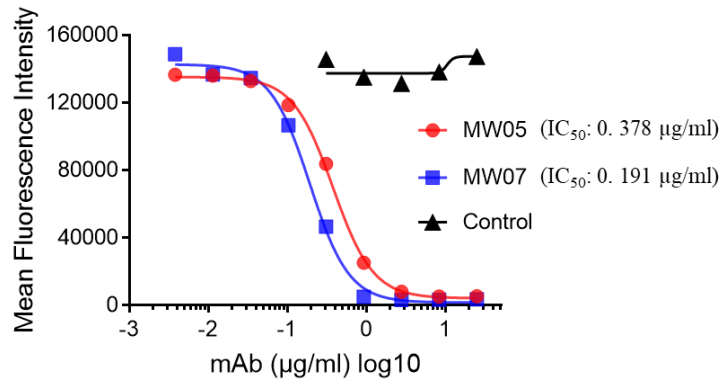

**Supplementary Fig. 1 The abilities of MW05 and MW07 to block SARS-CoV-2 RBD interaction with ACE2 overexpressing HEK293 cells was evaluated by FACS.** Pre-incubated mAb and SARS-CoV-2 RBD-mFc mixtures were added to ACE2 overexpressing HEK293 cells to check the binding of RBD to ACE2. Goat anti mouse IgG Fc-FITC was used as secondary antibody. Irrelevant human IgG1 was used as control.

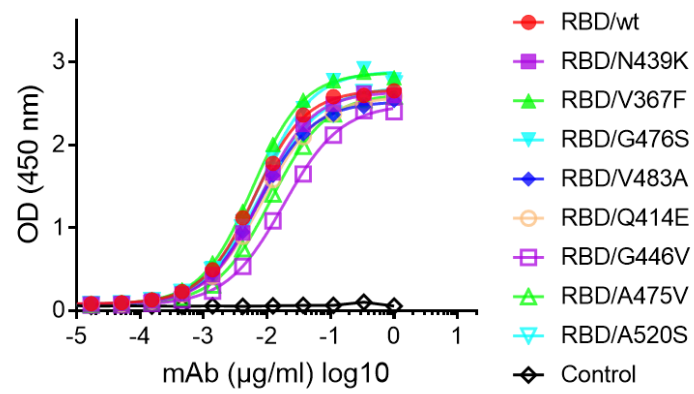

**Supplementary Fig. 2 Binding of ACE2 to different SARS-CoV-2 RBD mutants by ELISA.**

RBD recombinant proteins were coated on 96-well plates. Human ACE2-mFc was then added into plates to check the binding.

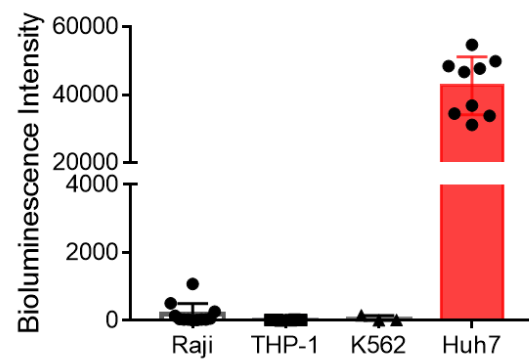

**Supplementary Fig. 3 The infection of SARS-CoV-2 pseudovirus in Raji, THP-1, K562 and Huh7 cells.** The average  $\pm$  SD from  $n=10$  of three independent experiments with technical duplicates is shown.

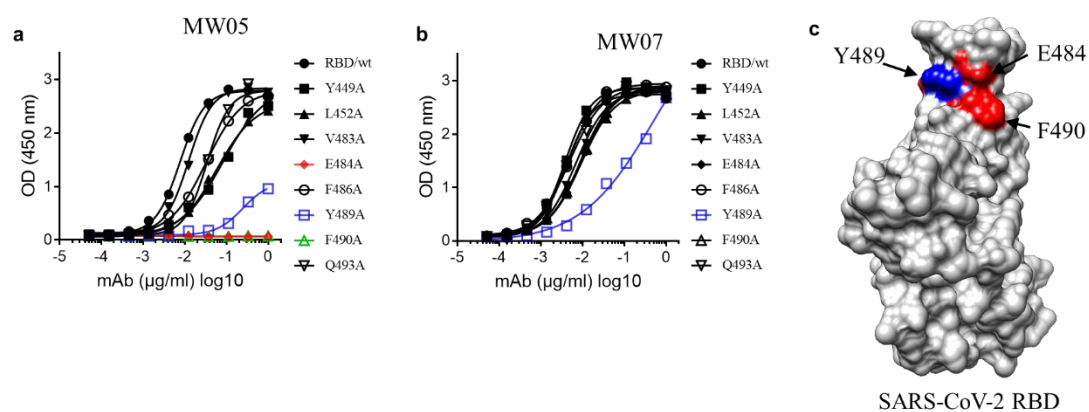

**Supplementary Fig. 4 Binding of MW05 and MW07 to SARS-CoV-2 RBD.** **a** Binding of MW05 to mutants was performed by ELISA. **b** Binding of MW07 to mutants was performed by ELISA. **c** Highlighting the key amino acid residues on SARS-CoV-2 RBD structure.

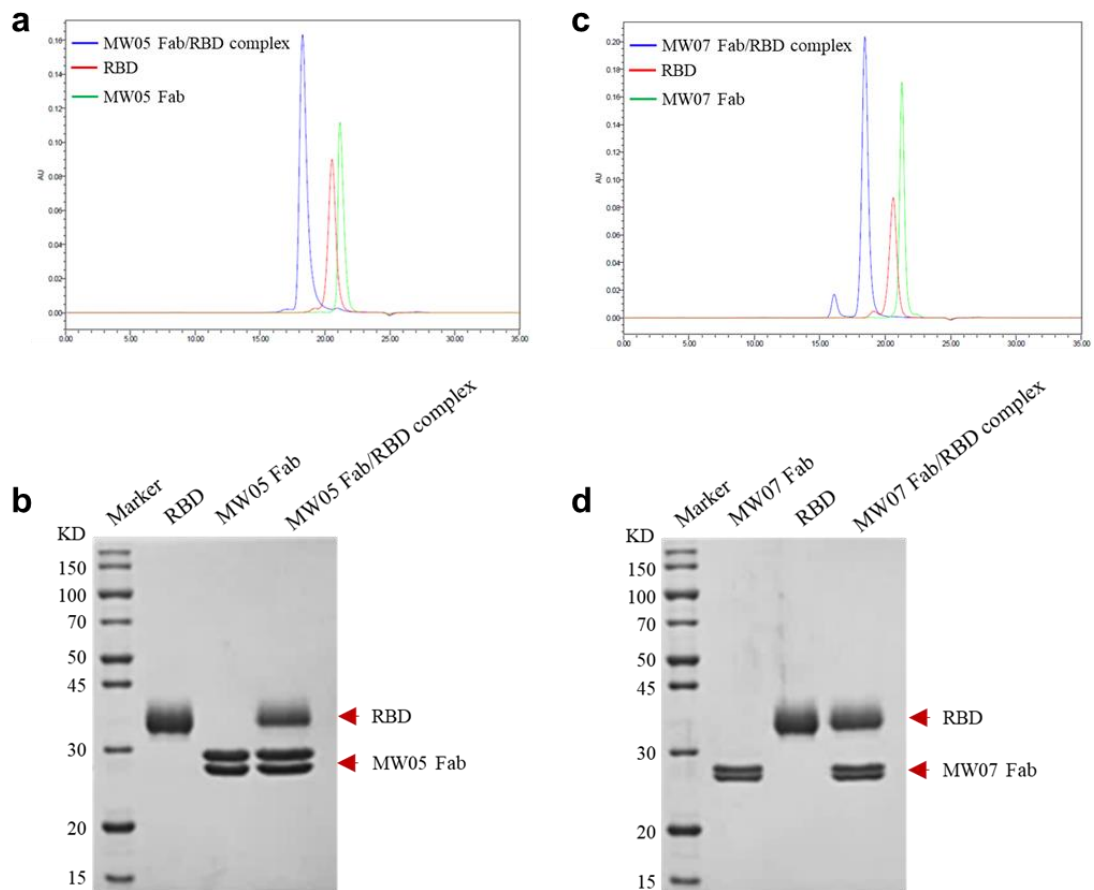

**Supplementary Fig. 5 Generation and identification of SARS-CoV-2 RBD/MW05 Fab and SARS-CoV-2 RBD/MW07 Fab complexes. a** Characterization of RBD, MW05 Fab and RBD/MW05 Fab complex by HPLC. **b** Characterization of RBD, MW05 Fab and RBD/MW05 Fab complex by SDS-PAGE. **c** Characterization of RBD, MW07 Fab and RBD/MW07 Fab complex by HPLC. **d** Characterization of RBD, MW07 Fab and RBD/MW07 Fab complex by SDS-PAGE.

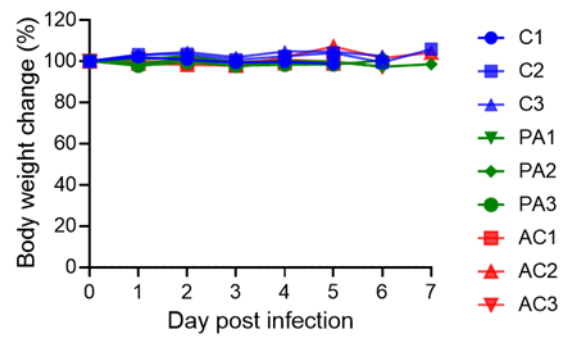

**Supplementary Fig. 6** The body weight of each monkey was checked every day. C indicates the control group, PA indicates the pre-challenge group and AC indicates the post-challenge group.

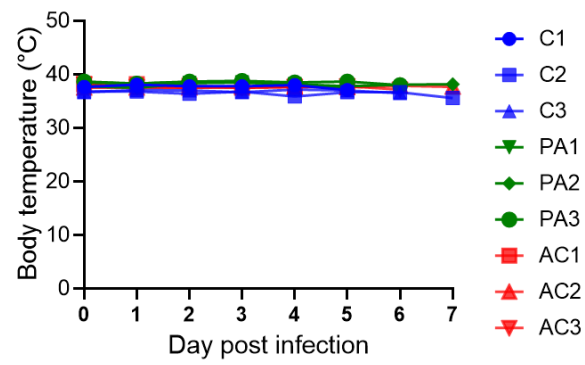

**Supplementary Fig. 7** The body temperature of each monkey was checked every day. C indicates the control group, PA indicates the pre-challenge group and AC indicates the post-challenge group.

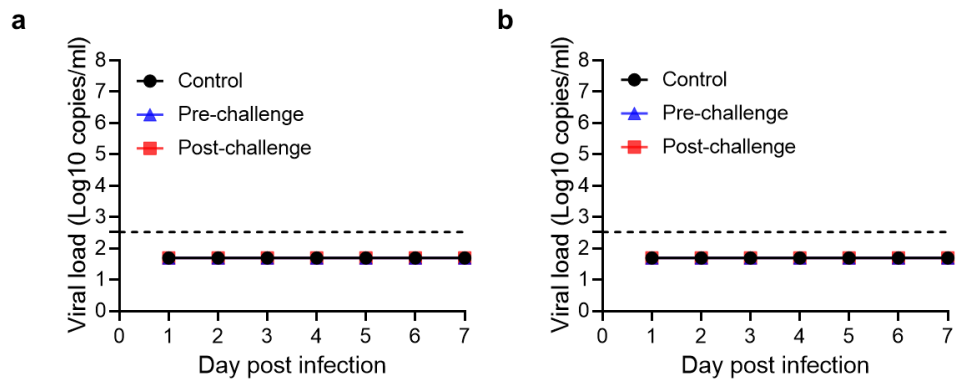

**Supplementary Fig. 8 Viral titer of nasal swabs (a) or blood samples (b) of all monkeys were evaluated by qRT-PCR.**

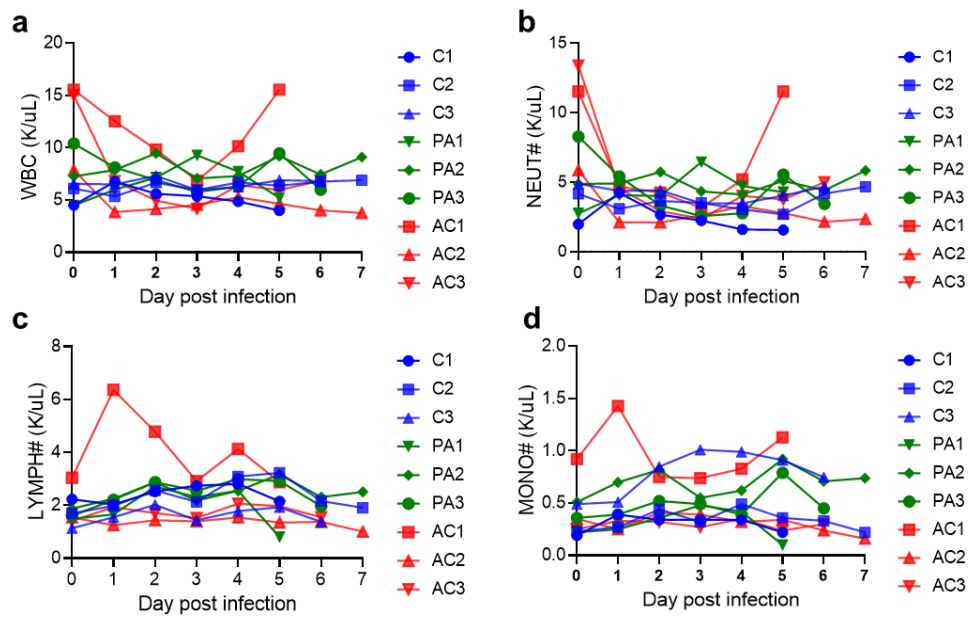

**Supplementary Fig. 9 White blood cells (a), neutrophils (b), lymphocytes (c) and monocytes (d) in each monkey were monitored every day. C indicates the control group, PA indicates the pre-challenge group and AC indicates the post-challenge group.**

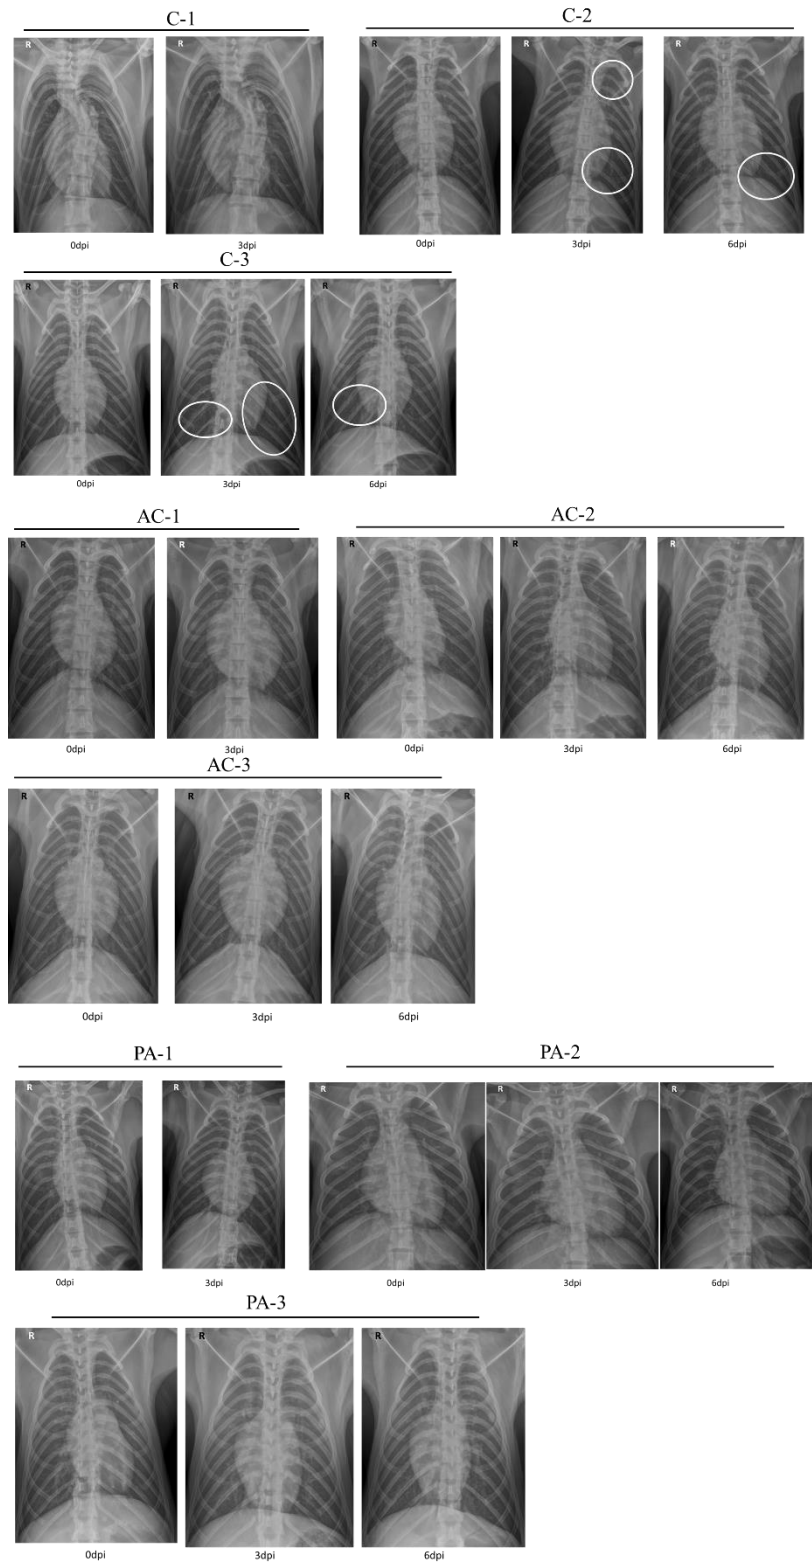

**Supplementary Fig. 10 X-ray imaging of all animals in this study.** C indicates the control group, PA indicates the pre-challenge (prophylactic) group and AC indicates the post-challenge (therapeutic) group.

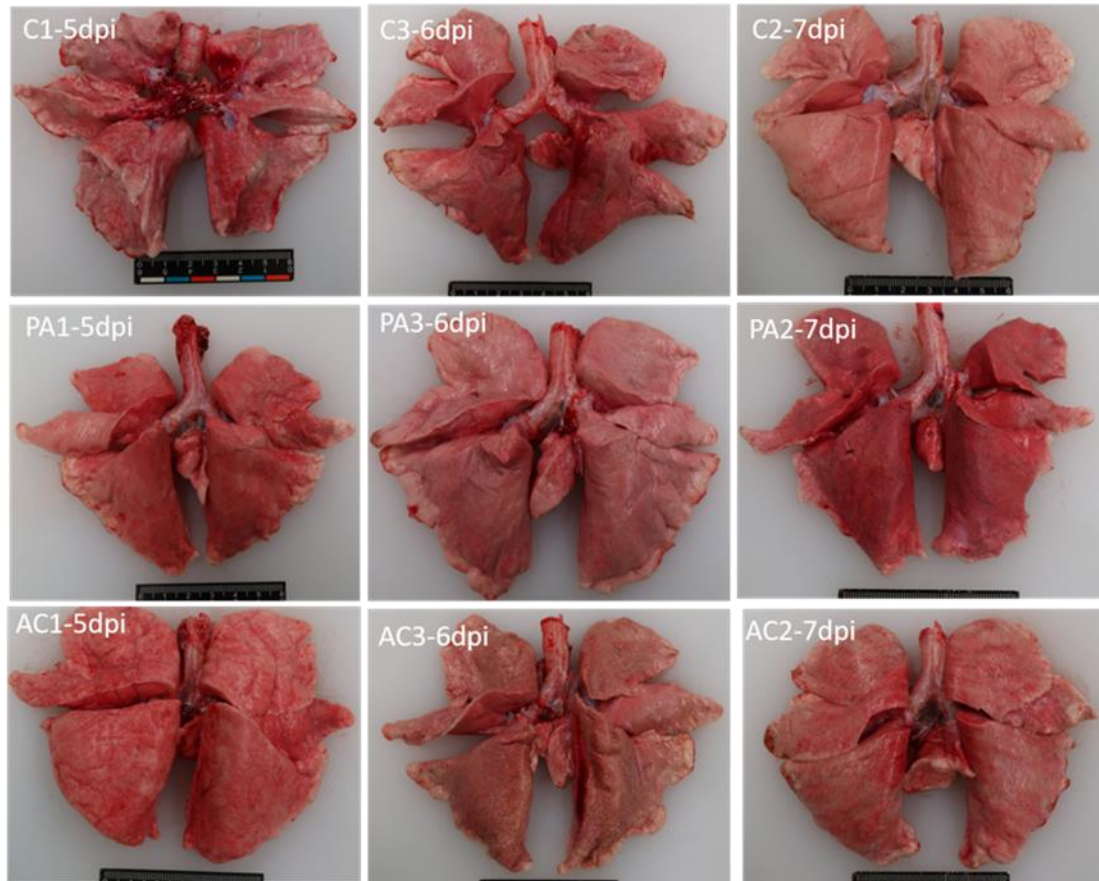

**Extended Data Fig. 11 Whole Lung Photograph of Experimental Animals.**

**Supplementary Table. 1 Summary of histopathology analysis of animals in control, prophylactic and therapeutic Groups**

| Experimental group | Animal #        | 5 dpi                               |                          |                                         |                          |                              |                                           |                                     | 6 dpi                    |                                         |                          |                              |                                           | 7 dpi                               |                          |                                         |                          |                              |                                           |
|--------------------|-----------------|-------------------------------------|--------------------------|-----------------------------------------|--------------------------|------------------------------|-------------------------------------------|-------------------------------------|--------------------------|-----------------------------------------|--------------------------|------------------------------|-------------------------------------------|-------------------------------------|--------------------------|-----------------------------------------|--------------------------|------------------------------|-------------------------------------------|
|                    |                 | Inflammatory cells in alveolar wall | Alveolar wall thickening | Inflammatory exudate in alveolar cavity | Alveolar cavity fibrosis | Peribronchiolar inflammation | Perivascular (small vessels) inflammation | Inflammatory cells in alveolar wall | Alveolar wall thickening | Inflammatory exudate in alveolar cavity | Alveolar cavity fibrosis | Peribronchiolar inflammation | Perivascular (small vessels) inflammation | Inflammatory cells in alveolar wall | Alveolar wall thickening | Inflammatory exudate in alveolar cavity | Alveolar cavity fibrosis | Peribronchiolar inflammation | Perivascular (small vessels) inflammation |
| Control group      | C1              | ++                                  | ++                       | ++                                      | +++                      | +                            | —                                         | /                                   | /                        | /                                       | /                        | /                            | /                                         | /                                   | /                        | /                                       | /                        | /                            | /                                         |
|                    | C2              | /                                   | /                        | /                                       | /                        | /                            | /                                         | /                                   | /                        | /                                       | /                        | /                            | /                                         | +                                   | ++                       | +                                       | +                        | +                            | +                                         |
|                    | C3              | /                                   | /                        | /                                       | /                        | /                            | /                                         | ++                                  | +++                      | +                                       | +                        | +                            | +                                         | /                                   | /                        | /                                       | /                        | /                            | /                                         |
|                    | Overall grading | ++/+++ (moderate-severe)            |                          |                                         |                          |                              |                                           |                                     | ++/+++ (moderate-severe) |                                         |                          |                              |                                           | ++ (moderate)                       |                          |                                         |                          |                              |                                           |
| Therapeutic group  | AC1             | ++                                  | ++                       | +                                       | ++                       | +                            | —                                         | /                                   | /                        | /                                       | /                        | /                            | /                                         | /                                   | /                        | /                                       | /                        | /                            | /                                         |
|                    | AC2             | /                                   | /                        | /                                       | /                        | /                            | /                                         | /                                   | /                        | /                                       | /                        | /                            | /                                         | +++                                 | +++                      | ++                                      | ++                       | +                            | +                                         |
|                    | AC3             | /                                   | /                        | /                                       | /                        | /                            | /                                         | ++                                  | ++                       | ++                                      | ++                       | +                            | +                                         | /                                   | /                        | /                                       | /                        | /                            | /                                         |
|                    | Overall grading | +/++ (mild-moderate)                |                          |                                         |                          |                              |                                           |                                     | +/++ (mild-moderate)     |                                         |                          |                              |                                           | ++/+++ moderate-severe              |                          |                                         |                          |                              |                                           |
| Prophylactic group | PA1             | ++                                  | ++                       | +                                       | +                        | +                            | +                                         | /                                   | /                        | /                                       | /                        | /                            | /                                         | /                                   | /                        | /                                       | /                        | /                            | /                                         |
|                    | PA2             | /                                   | /                        | /                                       | /                        | /                            | /                                         | /                                   | /                        | /                                       | /                        | /                            | /                                         | ++                                  | ++                       | +                                       | +                        | +                            | +                                         |
|                    | PA3             | /                                   | /                        | /                                       | /                        | /                            | /                                         | +                                   | +                        | +                                       | +                        | +                            | —                                         | /                                   | /                        | /                                       | /                        | /                            | /                                         |
|                    | Overall grading | +/++ (mild-moderate)                |                          |                                         |                          |                              |                                           |                                     | + /- (no lesions/mild)   |                                         |                          |                              |                                           | +/++ (mild-moderate)                |                          |                                         |                          |                              |                                           |

**Supplementary Table. 2 qPCR primers targeting SARS-CoV-2 S gene**

| Primer name        | Primer sequence             |
|--------------------|-----------------------------|
| SARS-CoV-2 RBD-qF1 | 5'-CAATGGTTTAACAGGCACAGG-3' |
| SARS-CoV-2 RBD-qR1 | 5'-CTCAAGTGTCTGTGGATCACG-3' |
